# Supplementary material for: The HALP–CONUT Integrated Score Predicts Survival and Postoperative Complications in Locally Advanced Esophageal Squamous Cell Carcinoma Following Neoadjuvant Therapy: Evidence from a Multicenter Retrospective Cohort Study
Source: Research Square preprint supplement (doi:10.21203/rs.3.rs-8184513/v1), 2025-12-05
Supplement: Supplementary file 1 [file 62567ccad22a0ebdc7548ae6.docx]

| | Table S1:Description of clinical and demographic characteristics of the selected patients. | | | | --- | --- | --- | | N |  | 410 | | Age | Median | 60.00(54.00-65.00) | | Sex | Male | 324(79.02%) | |  | Female | 86(20.98%) | | BMI(kg / m2) | Median | 21.51(19.77-23.66) | | Smoke | No | 164(40.00%) | |  | Yes | 246(60.00%) | | Drink | No | 201(49.02%) | |  | Yes | 209(50.98%) | | Charlson score | 0 | 232(56.59%) | |  | 1 | 120(29.27%) | |  | 2 | 39(9.51%) | |  | 3+ | 19(4.63%) | | Location | up | 43(10.49%) | |  | mid | 245(59.76%) | |  | low | 122(29.76%) | | Clinical T stage | cT1 | 135(32.93%) | |  | cT2 | 103(25.12%) | |  | cT3 | 98(23.90%) | |  | cT4 | 74(18.05%) | | Clinical N stage | cN0 | 83(20.24%) | |  | cN1 | 101(24.63%) | |  | cN2 | 143(34.88%) | |  | cN3 | 83(20.24%) | | Surgery | Ivor-Lewis | 194(47.32%) | |  | McKeown | 216(52.68%) | | Pathologic T stage | ypT0 | 60(14.63%) | |  | ypT1 | 58(14.15%) | |  | ypT2 | 73(17.80%) | |  | ypT3 | 204(49.76%) | |  | ypT4 | 15(3.66%) | | Pathologic N stage | ypN0 | 201(49.02%) | |  | ypN1 | 123(30.00%) | |  | ypN2 | 64(15.61%) | |  | ypN3 | 22(5.37%) | | Number of retrieved nodes | Median | 34(27-41) | | perineural invasion | No | 317(77.32%) | |  | Yes | 93(22.68%) | | lymphovascular invasion | No | 291(70.98%) | |  | Yes | 119(29.02%) | | Pathologic complete response | ypT0 ypN0 | 43(10.49%) | | HCIS | Low | 189(46.10%) | |  | Intermediate | 128(31.22%) | |  | High | 93(22.68%) | | Adjuvant therapies | No | 181(44.15%) | |  | Adjuvant radiation | 74(18.05%) | |  | Adjuvant chemotherapy | 74(18.05%) | |  | Adjuvant chemotherapy+radiotherapy | 81(19.76%) | | Neutrophil count(×109/L) | Median | 3.25(2.50-4.20) | | Lymphocyte count(×109/L) | Median | 1.71(1.32-2.14) | | Monocyte count(×109/L) | Median | 0.46(0.36-0.56) | | Platelet count(×109/L) | Median | 212.00(176.00-260.00) | | CEA(ng/ml) | Median | 2.56(1.90-3.70) | | CA199(U/ml) | Median | 16.20(8.74-41.53) | | Hemoglobin(g/L) | Median | 128.00(118.00-137.00) | | Albumin(g/L) | Median | 42.20(39.50-44.20) | | Total cholesterol(mg/dl) | Mean ± SD | 211.26±46.48 |   Table S2:Comparison of the unmatched HCIS groups. | | | | | |
| --- | --- | --- | --- | --- | --- | --- | --- | --- | --- | --- | --- | --- | --- | --- | --- | --- | --- | --- | --- | --- | --- | --- | --- | --- | --- | --- | --- | --- | --- | --- | --- | --- | --- | --- | --- | --- | --- | --- | --- | --- | --- | --- | --- | --- | --- | --- | --- | --- | --- | --- | --- | --- | --- | --- | --- | --- | --- | --- | --- | --- | --- | --- | --- | --- | --- | --- | --- | --- | --- | --- | --- | --- | --- | --- | --- | --- | --- | --- | --- | --- | --- | --- | --- | --- | --- | --- | --- | --- | --- | --- | --- | --- | --- | --- | --- | --- | --- | --- | --- | --- | --- | --- | --- | --- | --- | --- | --- | --- | --- | --- | --- | --- | --- | --- | --- | --- | --- | --- | --- | --- | --- | --- | --- | --- | --- | --- | --- | --- | --- | --- | --- | --- | --- | --- | --- | --- | --- | --- | --- | --- | --- | --- | --- | --- | --- | --- | --- | --- | --- | --- | --- | --- | --- | --- | --- | --- | --- | --- | --- | --- | --- | --- | --- | --- | --- | --- | --- | --- | --- | --- | --- | --- | --- | --- | --- | --- | --- | --- | --- |
|  |  | Low HCIS | Intermediate HCIS | High HCIS | P |
| N |  | 189 | 128 | 93 |  |
| Age | Median | 60.00(54-65) | 61.50(55.00-66.00) | 60.00(52.50-66.00) | 0.275 |
| BMI | Median | 22.31(20.03-24.01) | 21.30(19.61-23.63) | 21.08(19.38-22.48) | 0.012 |
| Sex | Male | 163(86.24%) | 92(71.88%) | 69(74.19%) | 0.004 |
|  | Female | 26(13.76%) | 36(28.12%) | 24(25.81%) |  |
| Charlson score | 0 | 123(65.08%) | 61(47.66%) | 48(51.61%) | 0.013 |
|  | 1 | 46(24.34%) | 49(38.28%) | 25(26.88%) |  |
|  | 2 | 14(7.41%) | 13(10.16%) | 12(12.90%) |  |
|  | 3+ | 6(3.17%) | 5(3.91%) | 8(8.60%) |  |
| Clinical T stage | 1 | 83(43.92%) | 39(30.47%) | 13(13.98%) | <0.001 |
|  | 2 | 42(22.22%) | 44(34.38%) | 17(18.28%) |  |
|  | 3 | 42(22.22%) | 23(17.97%) | 33(35.48%) |  |
|  | 4 | 22(11.64%) | 22(17.19%) | 30(32.26%) |  |
| Clinical N stage | 0 | 35(18.52%) | 30(23.44%) | 18(19.35%) | 0.006 |
|  | 1 | 55(29.10%) | 27(21.09%) | 19(20.43%) |  |
|  | 2 | 73(38.62%) | 45(35.16%) | 25(26.88%) |  |
|  | 3 | 26(13.76%) | 26(20.31%) | 31(33.33%) |  |
| Surgery | Ivor-Lewis | 103(54.50%) | 52(40.63%) | 39(41.94%) | 0.026 |
|  | McKeown | 86(45.50%) | 76(59.38%) | 54(58.06%) |  |
| Retrieved nodes | Median | 33(27-39) | 34(28-41) | 38(29.5-43) | 0.019 |
| Adjuvant therapies | No | 99(52.38%) | 61(47.66%) | 21(22.58%) | <0.001 |
|  | Adjuvant radiation | 33(17.46%) | 26(20.31%) | 15(16.13%) |  |
|  | Adjuvant chemotherapy | 33(17.46%) | 18(14.06%) | 23(24.73%) |  |
|  | Adjuvant chemotherapy+radiotherapy | 24(12.70%) | 23(17.97%) | 34(36.56%) |  |

| Table S3:Comparison of the matched HCIS groups. | | | | | |
| --- | --- | --- | --- | --- | --- |
|  |  | Low HCIS | Intermediate HCIS | High HCIS | P |
| N |  | 64 | 64 | 64 |  |
| Age | Median | 60.00(55.00-65.00) | 63.00(56.25-68.75) | 61.50(53.25-66.00) | 0.209 |
| BMI | Median | 21.47(19.61-23.50) | 21.26(19.31-22.79) | 21.45(19.91-22.79) | 0.800 |
| Sex | Male | 49(76.56%) | 41(64.06%) | 47(73.44%) | 0.266 |
|  | Female | 15(23.44%) | 23(35.94%) | 17(26.56%) |  |
| Charlson score | 0 | 35(54.69%) | 33(51.56%) | 32(50.00%) | 0.963 |
|  | 1 | 18(28.13%) | 22(34.38%) | 20(31.25%) |  |
|  | 2 | 6(9.38%) | 6(9.38%) | 8(12.50%) |  |
|  | 3+ | 5(7.81%) | 3(4.69%) | 4(6.25%) |  |
| Clinical T stage | 1 | 13(20.31%) | 24(37.50%) | 16(25.00%) | 0.217 |
|  | 2 | 17(26.56%) | 17(26.56%) | 13(20.31%) |  |
|  | 3 | 20(31.25%) | 11(17.19%) | 15(23.44%) |  |
|  | 4 | 14(21.86%) | 12(18.75%) | 20(31.25%) |  |
| Clinical N stage | 0 | 12(18.75%) | 14(21.86%) | 14(21.86%) | 0.511 |
|  | 1 | 13(20.31%) | 11(17.19%) | 13(20.31%) |  |
|  | 2 | 29(45.31%) | 27(42.19%) | 19(29.69%) |  |
|  | 3 | 10(15.63%) | 12(18.75%) | 18(28.13%) |  |
| Surgery | Ivor-Lewis | 23(35.94%) | 25(39.06%) | 39(60.94%) | 0.857 |
|  | McKeown | 41(64.06%) | 39(60.94%) | 26(40.63%) |  |
| Retrieved nodes | Median | 35.50(29.00-42.00) | 35.00(27.25-41.75) | 38(30.00-41.75) | 0.722 |
| Adjuvant therapies | No | 24(37.50%) | 33(51.56%) | 15(23.44%) | 0.065 |
|  | Adjuvant radiation | 12(18.75%) | 10(15.63%) | 16(25.00%) |  |
|  | Adjuvant chemotherapy | 8(12.50%) | 9(14.06%) | 12(18.75%) |  |
|  | Adjuvant chemotherapy+radiotherapy | 20(31.25%) | 12(18.75%) | 21(32.81%) |  |

| Table S4:Correlations between OS and HCIS and other clinicopathological factors. | | |  |  |
| --- | --- | --- | --- | --- |
|  | Univariate analysis | | Multivariate analysis | |
|  | Hazard ratio(95%CI) | p-value | Hazard ratio(95%CI) | p-value |
| Age |  |  |  |  |
| ＜60 | reference |  |  |  |
| ≥60 | 1.048(0.791-1.389) | 0.744 |  |  |
| Sex |  |  |  |  |
| Female | reference |  | reference |  |
| Male | 1.426(1.007-2.018) | 0.045 | 0.922(0.580-1.467) | 0.733 |
| BMI |  |  |  |  |
| ≤23.9 | reference |  | reference |  |
| ＞23.9 | 1.509(1.098-2.073) | 0.011 | 1.470(1.042-2.072) | 0.028 |
| Smoke |  |  |  |  |
| No | reference |  | reference |  |
| Yes | 1.654(1.241-2.206) | ＜0.001 | 1.329(0.934-1.892) | 0.114 |
| Drink |  |  |  |  |
| No | reference |  |  |  |
| Yes | 1.256(0.949-1.663) | 0.11 |  |  |
| Adjuvant therapies |  |  |  |  |
| No | reference |  | reference |  |
| Adjuvant radiation | 0.663(0.430-1.023) | 0.063 | 0.521(0.325-0.836) | 0.007 |
| Adjuvant chemotherapy | 1.397(0.959-2.035) | 0.082 | 1.395(0.924-2.064) | 0.096 |
| Adjuvant chemotherapy+radiotherapy | 2.098(1.458-3.020) | ＜0.001 | 1.493(0.981-2.271) | 0.061 |
| ypT |  |  |  |  |
| 0 | reference |  | reference |  |
| 1 | 1.570(0.803-3.068) | 0.009 | 2.323(1.147-4.704) | 0.019 |
| 2 | 2.551(1.403-4.641) | 0.002 | 2.956(1.584-5.517) | ＜0.001 |
| 3 | 3.035(1.770-5.204) | ＜0.001 | 3.331(1.849-6.002) | ＜0.001 |
| 4 | 3.743(1.894-6.753) | 0.007 | 3.729(2.158-7.467) | 0.015 |
| ypN |  |  |  |  |
| 0 | reference |  | reference |  |
| 1 | 1.478(1.059-2.063) | 0.022 | 1.420(1.121-2.184) | 0.005 |
| 2 | 2.158(1.480-3.147) | ＜0.001 | 1.721(1.080-2.743) | 0.022 |
| 3 | 3.200(1.863-5.499) | ＜0.001 | 2.492(1.266-4.905) | 0.008 |
| perineural invasion |  |  |  |  |
| 0 | reference |  | reference |  |
| 1 | 1.399(1.018-1.924) | 0.039 | 1.348(1.014-2.138) | 0.705 |
| lymphovascular invasion |  |  |  |  |
| 0 | reference |  | reference |  |
| 1 | 1.802(1.344-2.416) | 0.005 | 1.249(1.057-1.729) | 0.547 |
| Clavien-Dindo |  |  |  |  |
| I-II | reference |  |  |  |
| III-V | 1.324(0.924-1.898) | 0.126 |  |  |
| HCIS |  |  |  |  |
| Low | reference |  | reference |  |
| Intermediate | 1.992(1.444-2.748) | ＜0.001 | 1.898(1.256-2.868) | 0.002 |
| High | 4.770(3.151-7.219) | ＜0.001 | 4.588(2.461-8.553) | ＜0.001 |
| Neutrophil count(×10**9**/L) | 0.879(0.790-0.978) | 0.018 | 1.002(0.997-1.014) | 0.209 |
| Lymphocyte count(×10**9**/L) | 0.511(0.390-0.671) | ＜0.001 | 0.912(0.655-1.269) | 0.585 |
| Monocyte count(×10**9**/L) | 0.530(0.260-1.079) | 0.08 |  |  |
| Platelet count(×10**9**/L) | 1.001(0.999-1.003) | 0.493 |  |  |
| CEA(ng/ml) | 0.963(0.901-1.030) | 0.274 |  |  |
| CA199(U/ml) | 1.000(0.996-1.004) | 0.949 |  |  |
| Hemoglobin(g/L) | 0.982(0.973-0.991) | ＜0.001 | 0.994(0.981-1.007) | 0.351 |
| Albumin(g/L) | 0.949(0.913-0.986) | 0.008 | 1.011(0.965-1.058) | 0.652 |
| Total cholesterol(mg/dl) | 0.995(0.992-0.999) | 0.005 | 0.999(0.996-1.003) | 0.667 |
