# Supplementary material for: The HALP–CONUT Integrated Score Predicts Survival and Postoperative Complications in Locally Advanced Esophageal Squamous Cell Carcinoma Following Neoadjuvant Therapy: Evidence from a Multicenter Retrospective Cohort Study
Source: Research Square preprint supplement (doi:10.21203/rs.3.rs-8184513/v1), 2025-12-05
Supplement: Supplementary file 1 [file 3460328ca4b6c2d0feffe343.pdf]

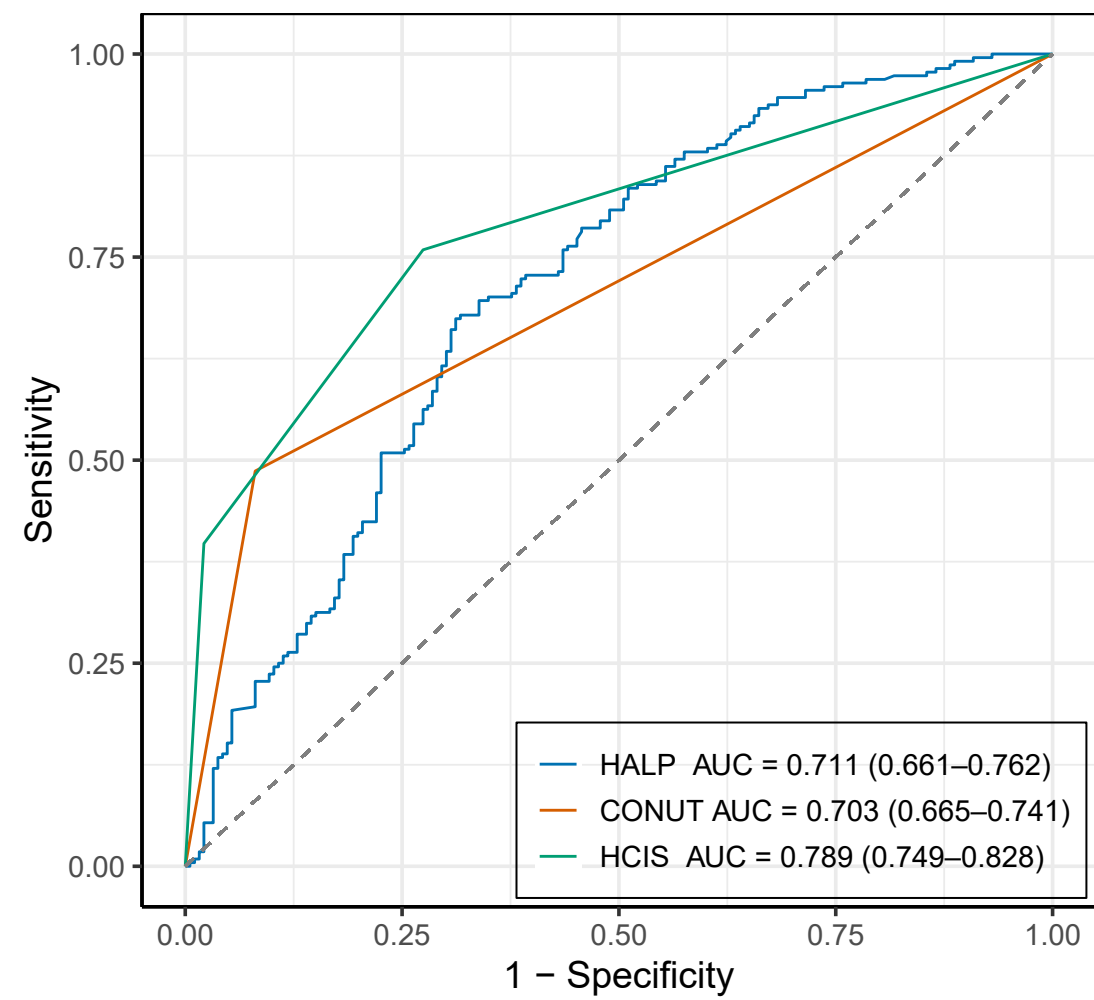

Figure S2: Receiver operating characteristic (ROC) curves comparing the 5-year overall survival predictive performance of HCIS, HALP, and CONUT scores in patients with locally advanced esophageal squamous cell carcinoma after neoadjuvant therapy followed by surgery.
