# Supplementary material for: The HALP–CONUT Integrated Score Predicts Survival and Postoperative Complications in Locally Advanced Esophageal Squamous Cell Carcinoma Following Neoadjuvant Therapy: Evidence from a Multicenter Retrospective Cohort Study
Source: Research Square preprint supplement (doi:10.21203/rs.3.rs-8184513/v1), 2025-12-05
Supplement: Supplementary file 2 [file 91aa2c975618edd61a07caa8.docx]

| Table1:Univariate and multivariate logistic regression analyses assessing the association between clinical factors and postoperative Clavien-Dindo grade ≥III complications, presented as OR (95% CI) and P-value. | | | | | | |
| --- | --- | --- | --- | --- | --- | --- |
|  |  | Univariate analysis | |  | Multivariate analysis | |
|  |  | OR(95%CI) | P |  | OR(95%CI) | P |
| Age(years) |  |  |  |  |  |  |
| ＜60 |  | 1.00(Reference) |  |  | 1.00(Reference) |  |
| ≥60 |  | 1.622(0.973-2.701) | 0.063 |  | 1.612(0.915-2.838) | 0.098 |
| BMI(kg/m²) |  | 1.010(0.929-1.098) | 0.824 |  | 1.065(0.971-1.167) | 0.18 |
| Sex |  |  |  |  |  |  |
| Female |  | 1.00(Reference) |  |  | 1.00(Reference) |  |
| Male |  | 1.143(0.614-2.126) | 0.674 |  | 1.989(0.826-4.786) | 0.125 |
| Smoke |  |  |  |  |  |  |
| No |  | 1.00(Reference) |  |  | 1.00(Reference) |  |
| Yes |  | 1.013(0.612-1.677) | 0.959 |  | 1.344(0.629-2.874) | 0.445 |
| Drink |  |  |  |  |  |  |
| No |  | 1.00(Reference) |  |  | 1.00(Reference) |  |
| Yes |  | 0.894(0.546-1.465) | 0.658 |  | 0.712(0.363-1.400) | 0.325 |
| Surgery |  |  |  |  |  |  |
| Ivor-Lewis |  | 1.00(Reference) |  |  | 1.00(Reference) |  |
| McKeown |  | 1.204(0.733-1.978) | 0.464 |  | 0.951(0.491-1.840) | 0.881 |
| Number of retrieved nodes(n) |  | 1.014(0.986-1.043) | 0.318 |  | 1.006(0.970-1.044) | 0.742 |
| Platelet counts(×109/L) |  | 1.000(0.996-1.003) | 0.854 |  | 0.998(0.993-1.002) | 0.356 |
| Neutrophil counts (×109/L) |  | 1.110(0.962-1.281) | 0.154 |  | 1.041(0.869-1.247) | 0.661 |
| Lymphocyte count (×10**9**/L) |  | 1.583(1.090-2.298) | 0.016 |  | 1.729(1.114-2.682) | 0.015 |
| Monocyte count (×10**9**/L) |  | 1.594(0.540-4.704) | 0.398 |  | 1.034(0.231-4.627) | 0.965 |
| Hemoglobin(g/L) |  | 0.973(0.957-0.989) | 0.001 |  | 0.984(0.963-1.005) | 0.137 |
| Albumin(g/L) |  | 0.933(0.876-0.993) | 0.030 |  | 1.018(0.943-1.099) | 0.646 |
| Total cholesterol(mg/dl) |  | 0.995(0.990-1.001) | 0.083 |  | 1.002(0.996-1.009) | 0.424 |
| HCIS |  |  |  |  |  |  |
| Low |  | 1.00(Reference) |  |  | 1.00(Reference) |  |
| Intermediate |  | 2.624(1.339-5.145) | 0.005 |  | 2.393(1.128-5.076) | 0.023 |
| High |  | 7.144(3.695-13.813) | ＜0.001 |  | 7.771(3.521-17.150) | ＜0.001 |
