# Supplementary material for: The HALP–CONUT Integrated Score Predicts Survival and Postoperative Complications in Locally Advanced Esophageal Squamous Cell Carcinoma Following Neoadjuvant Therapy: Evidence from a Multicenter Retrospective Cohort Study
Source: Research Square preprint supplement (doi:10.21203/rs.3.rs-8184513/v1), 2025-12-05
Supplement: Supplementary file 2 [file bd9541f08a8fe9b0dbb953a0.pdf]

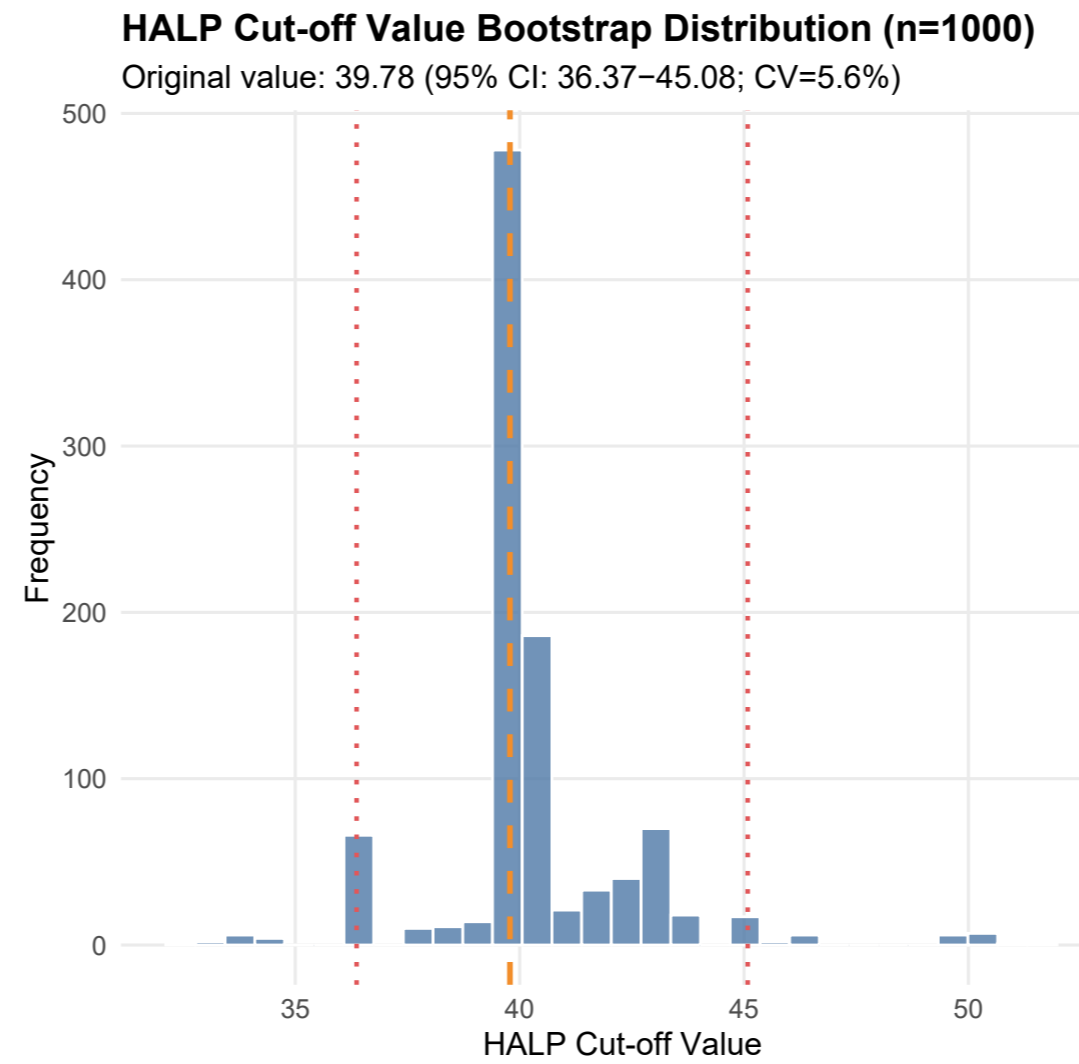

Figure S1: The histogram shows a distribution of the HALP cut-off value. An orange dashed line marks the original value (39.78). The distribution appears roughly normal, centered near this original value.
