# Supplementary material for: The HALP–CONUT Integrated Score Predicts Survival and Postoperative Complications in Locally Advanced Esophageal Squamous Cell Carcinoma Following Neoadjuvant Therapy: Evidence from a Multicenter Retrospective Cohort Study
Source: Research Square preprint supplement (doi:10.21203/rs.3.rs-8184513/v1), 2025-12-05
Supplement: Supplementary file 3 [file c08c12d53afc0dbc2e63129d.docx]

| Table2: Univariate and Multivariate Logistic Regression Analyses of Pathological Complete Response (pCR) in Patients with Locally Advanced Esophageal Squamous Cell Carcinoma Following Neoadjuvant Therapy. | | | | | | | |
| --- | --- | --- | --- | --- | --- | --- | --- |
|  |  | Univariate analysis | |  | Multivariate analysis | |
|  |  | OR(95%CI) | P |  | OR(95%CI) | P |
| Age(years) |  |  |  |  |  |  |
| ＜60 |  | 1.00(Reference) |  |  | 1.00(Reference) |  |
| ≥60 |  | 0.687(0.358-1.317) | 0.258 |  | 0.671(0.321-1.400) | 0.287 |
| Sex |  |  |  |  |  |  |
| Female |  | 1.00(Reference) |  |  | 1.00(Reference) |  |
| Male |  | 0.997(0.459-2.167) | 0.994 |  | 1.161(0.342-3.943) | 0.811 |
| cT |  |  |  |  |  |  |
| 1 |  | 1.00(Reference) |  |  | 1.00(Reference) |  |
| 2 |  | 1.040(0.439-2.466) | 0.087 |  | 1.581(0.547-3.573) | 0.398 |
| 3 |  | 1.139(0.508-2.555) | 0.751 |  | 0.838(0.330-2.126) | 0.710 |
| 4 |  | 2.329(0.884-6.136) | 0.928 |  | 0.741(0.444-2.031) | 0.560 |
| cN |  |  |  |  |  |  |
| 0 |  | 1.00(Reference) |  |  | 1.00(Reference) |  |
| 1 |  | 1.743(1.140-3.529) | 0.015 |  | 1.650(0.660-4.150) | 0.283 |
| 2 |  | 3.176(1.367-7.378) | 0.007 |  | 1.321(0.664-2.743) | 0.409 |
| 3 |  | 3.207(0.740-4.107) | 0.204 |  | 1.524(0.986-2.471) | 0.749 |
| Smoke |  |  |  |  |  |  |
| No |  | 1.00(Reference) |  |  | 1.00(Reference) |  |
| Yes |  | 1.417(1.014-2.547) | 0.294 |  | 1.339(1.147-2.146) | 0.057 |
| Drink |  |  |  |  |  |  |
| No |  | 1.00(Reference) |  |  | 1.00(Reference) |  |
| Yes |  | 0.992(0.527-1.866) | 0.979 |  | 1.707(0.724-4.027) | 0.222 |
| CEA(ng/ml) |  | 1.016(0.903-1.144) | 0.786 |  | 0.966(0.846-1.104) | 0.616 |
| CA199(U/ml) |  | 1.008(0.997-1.019) | 0.170 |  | 1.010(0.997-1.022) | 0.126 |
| Platelet counts(×10**9**/L) |  | 1.001(0.996-1.006) | 0.805 |  | 0.998(0.992-1.004) | 0.558 |
| Neutrophil counts (×10**9**/L) |  | 1.373(1.051-1.794) | 0.020 |  | 1.520(1.078-2.144) | 0.017 |
| Monocyte count (×10**9**/L) |  | 1.717(1.313-2.411) | 0.533 |  | 1.810(1.195-3.472) | 0.602 |
| Hemoglobin(g/L) |  | 1.001(0.980-1.022) | 0.922 |  | 1.016(0.986-1.048) | 0.302 |
| Albumin(g/L) |  | 0.999(0.920-1.086) | 0.989 |  | 1.057(0.940-1.189) | 0.351 |
| Total cholesterol(mg/dl) |  | 0.992(0.986-0.998) | 0.013 |  | 0.990(0.982-0.998) | 0.020 |
| HCIS |  |  |  |  |  |  |
| Low |  | 1.00(Reference) |  |  | 1.00(Reference) |  |
| Intermediate |  | 3.030(1.293-7.099) | 0.011 |  | 4.930(2.733-8.146) | 0.003 |
| High |  | 3.767(1.289-11.011) | 0.015 |  | 6.470(3.577-12.40) | 0.005 |
